# Supplementary material for: Assimilation of Carbonyl Sulfide (COS) fluxes within the adjoint-based data assimilation system–Nanjing University Carbon Assimilation System (NUCAS v1.0)
Source: Copernicus journal article supplement (doi:10.5194/egusphere-2023-1955), 2023-09-27
Supplement: Supplementary file 2 [file egusphere-2023-1955-supplement.pdf]

*Supplement of*

5 **Assimilation of Carbonyl Sulfide (COS) fluxes within the adjoint-based data assimilation system—Nanjing University Carbon Assimilation System (NUCAS v1.0)**

Huajie Zhu et al.

Correspondence to: Mousong Wu ([mousongwu@nju.edu.cn](mailto:mousongwu@nju.edu.cn))

10

15

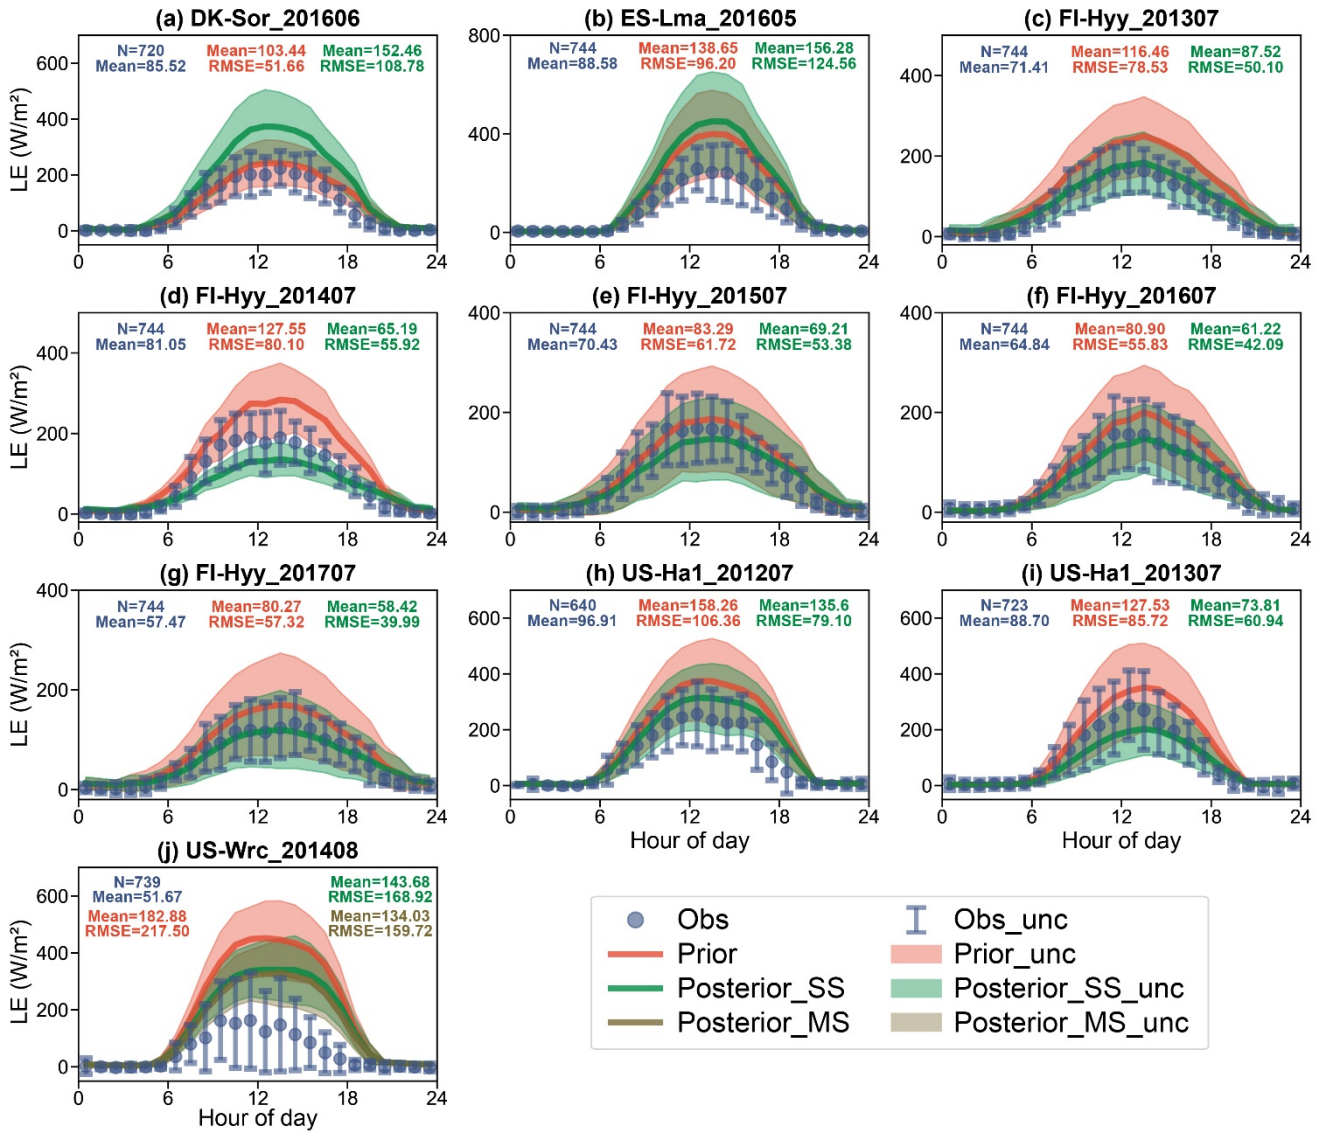

20

Figure S1. The diurnal cycle of observed (blue) and simulated LE using prior parameters (red), single-site (green) and multi-site (brown) posterior parameters. The size of the circle indicates the number of observations within each circle, and the error bars depict the standard deviations in the mean of observations from the variability within each circle. Lines connect the mean values of simulations and pale bands depict the standard deviation in the mean of simulations from the variability within each bin.

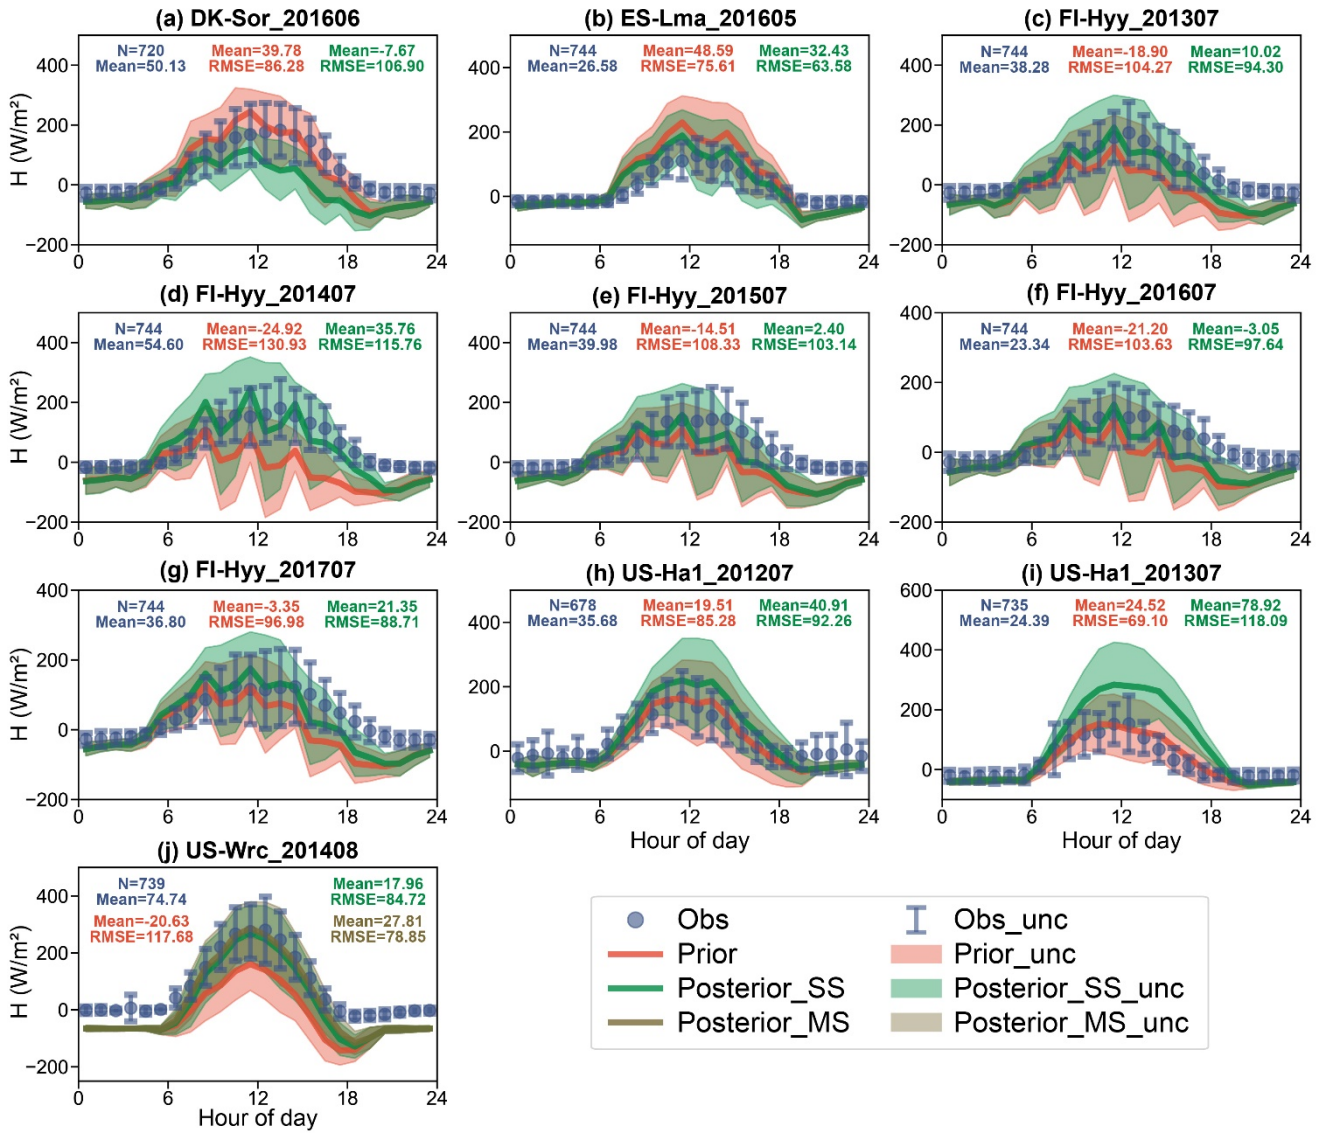

25

Figure S2. The diurnal cycle of observed (blue) and simulated H using prior parameters (red), single-site (green) and multi-site (brown) posterior parameters. The size of the circle indicates the number of observations within each circle, and the error bars depict the standard deviations in the mean of observations from the variability within each circle. Lines connect the mean values of simulations and pale bands depict the standard deviation in the mean of simulations from the variability within each bin.

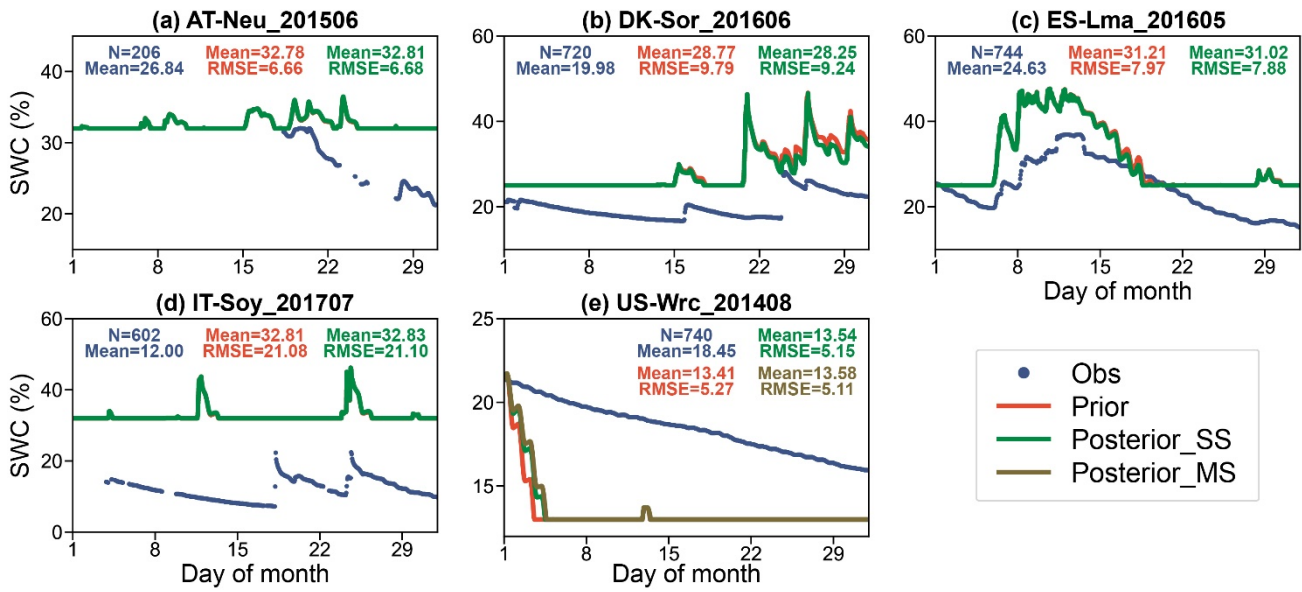

Figure S3. Observed (blue point) and simulated SWC (%). Results show SWC simulated using prior parameters (red line), single-site (green line) and multi-site (brown line) posterior parameters.

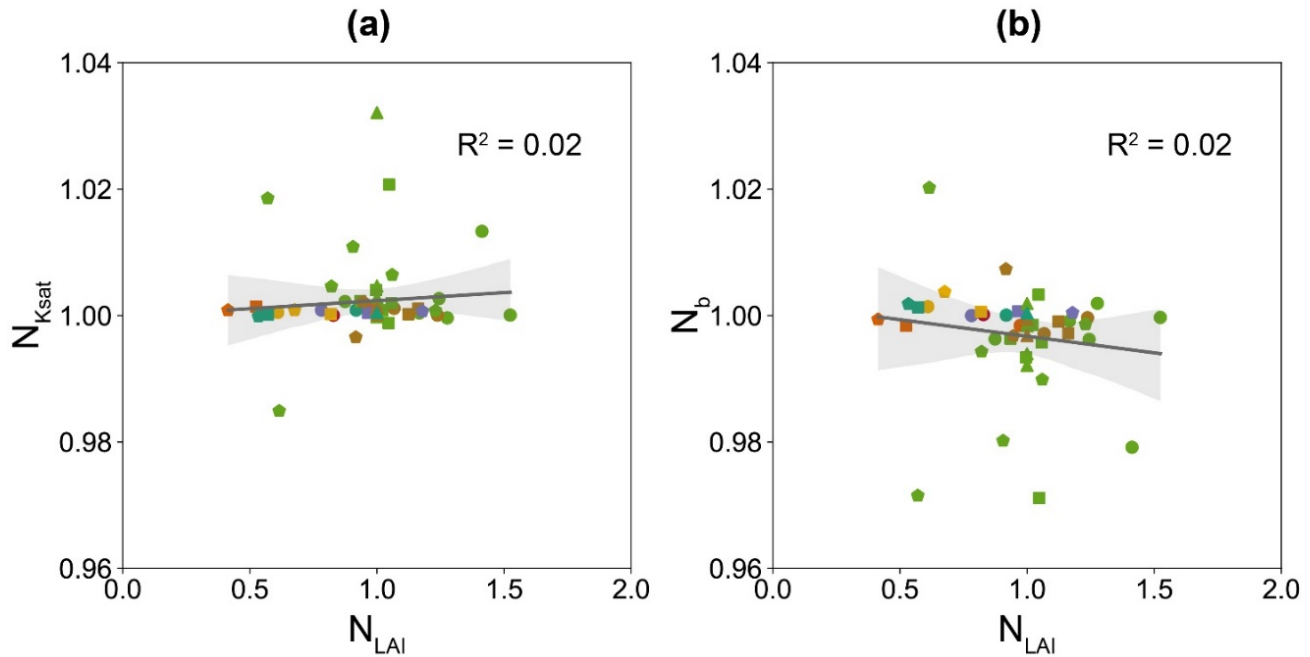

Figure S4. Influence of LAI on the posterior  $K_{sat}$  (a), the posterior  $b$  (b) obtained by the single-site experiments conducted at seven sites and driven by four LAI data. The posterior  $K_{sat}$ , the posterior  $b$  and the LAI were represented by their normalized values  $N_{Ksat}$ ,  $N_b$  and  $N_{LAI}$ , respectively. The posterior parameters were normalized by their prior values and the LAI were normalized by the in situ values.

**Table S1. PFT and Soil Texture descriptions in BEPS model.**

| PFT No.          | Descriptions                |
|------------------|-----------------------------|
| 1                | Evergreen needleleaf forest |
| 2                | Deciduous needleleaf forest |
| 3                | Deciduous broadleaf forest  |
| 4                | Evergreen broadleaf forest  |
| 5                | Mixed forest                |
| 6                | Shrub                       |
| 7                | Grass                       |
| 8                | Crop                        |
| 9                | C4 Grass                    |
| 10               | C4 Crop                     |
| Soil texture No. | Description                 |
| 1                | Sand                        |
| 2                | Loamy sand                  |
| 3                | Sandy loam                  |
| 4                | Loam                        |
| 5                | Silty loam                  |
| 6                | Sandy clay loam             |
| 7                | Clay loam                   |
| 8                | Silty clay loam             |
| 9                | Sandy clay                  |
| 10               | Silty clay                  |
| 11               | Clay                        |

40

**Table S2. Description of parameters used for optimizations within the Nanjing University Carbon Assimilation System (NUCAS). Parameters are either specified per PFT, per soil texture, or globally, i.e all PFTs and textures share one value, as indicated in column 2.**

| No. | Parameter    | Dependent | Unit                                | Description                        | Prior Value | Prior Uncertainty |
|-----|--------------|-----------|-------------------------------------|------------------------------------|-------------|-------------------|
| 1   |              |           |                                     |                                    | 62.5        | 15.625            |
| 2   |              |           |                                     |                                    | 39.1        | 9.775             |
| 3   |              |           |                                     |                                    | 57.7        | 14.425            |
| 4   |              |           |                                     |                                    | 29          | 7.25              |
| 5   | $V_{cmax25}$ | PFT       | $\mu\text{mol}/\text{m}^2/\text{s}$ | maximum carboxylation rate at 25°C | 66          | 16.5              |
| 6   |              |           |                                     |                                    | 57.85       | 14.4625           |
| 7   |              |           |                                     |                                    | 48          | 12                |
| 8   |              |           |                                     |                                    | 84.5        | 21.125            |
| 9   |              |           |                                     |                                    | 30          | 7.5               |
| 10  |              |           |                                     |                                    | 30          | 7.5               |
| 11  | VJ_slope     | PFT       | -                                   |                                    | 2.39        | 0.5975            |

|    |           |         |         |                                                                         |        |          |
|----|-----------|---------|---------|-------------------------------------------------------------------------|--------|----------|
| 12 |           |         |         |                                                                         | 2.39   | 0.5975   |
| 13 |           |         |         |                                                                         | 2.39   | 0.5975   |
| 14 |           |         |         |                                                                         | 2.39   | 0.5975   |
| 15 |           |         |         |                                                                         | 2.39   | 0.5975   |
| 16 |           |         |         | Slope of the $V_{max}$ and $J_{max}$ (maximum electron transport rate)  | 2.39   | 0.5975   |
| 17 |           |         |         | relationship                                                            | 2.39   | 0.5975   |
| 18 |           |         |         |                                                                         | 2.39   | 0.5975   |
| 19 |           |         |         |                                                                         | 2.39   | 0.5975   |
| 20 |           |         |         |                                                                         | 2.39   | 0.5975   |
| 21 |           |         |         |                                                                         | 0.046  | 0.0115   |
| 22 |           |         |         |                                                                         | 0.046  | 0.0115   |
| 23 |           |         |         |                                                                         | 0.046  | 0.0115   |
| 24 |           |         |         |                                                                         | 0.046  | 0.0115   |
| 25 | Q10       | PFT     | -       | Soil respiration temperature factor                                     | 0.046  | 0.0115   |
| 26 |           |         |         |                                                                         | 0.046  | 0.0115   |
| 27 |           |         |         |                                                                         | 0.046  | 0.0115   |
| 28 |           |         |         |                                                                         | 0.046  | 0.0115   |
| 29 |           |         |         |                                                                         | 0.046  | 0.0115   |
| 30 |           |         |         |                                                                         | 0.046  | 0.0115   |
| 31 |           |         |         |                                                                         | 6.2473 | 1.561825 |
| 32 |           |         |         |                                                                         | 6.2473 | 1.561825 |
| 33 |           |         |         |                                                                         | 6.2473 | 1.561825 |
| 34 |           |         |         |                                                                         | 6.2473 | 1.561825 |
| 35 | SIF_alpha | PFT     | $W/m^2$ | Quadratic term coefficient for the relationship between additional heat | 6.2473 | 1.561825 |
| 36 |           |         |         | dissipation under light adapted conditions and relative reduction of    | 6.2473 | 1.561825 |
| 37 |           |         |         | photochemical yield                                                     | 6.2473 | 1.561825 |
| 38 |           |         |         |                                                                         | 6.2473 | 1.561825 |
| 39 |           |         |         |                                                                         | 6.2473 | 1.561825 |
| 40 |           |         |         |                                                                         | 6.2473 | 1.561825 |
| 41 |           |         |         |                                                                         | 0.5994 | 0.14985  |
| 42 |           |         |         |                                                                         | 0.5994 | 0.14985  |
| 43 |           |         |         |                                                                         | 0.5994 | 0.14985  |
| 44 |           |         |         |                                                                         | 0.5994 | 0.14985  |
| 45 | SIF_beta  | PFT     | $W/m^2$ | Primary term coefficient for the relationship between additional heat   | 0.5994 | 0.14985  |
| 46 |           |         |         | dissipation under light adapted conditions and relative reduction of    | 0.5994 | 0.14985  |
| 47 |           |         |         | photochemical yield                                                     | 0.5994 | 0.14985  |
| 48 |           |         |         |                                                                         | 0.5994 | 0.14985  |
| 49 |           |         |         |                                                                         | 0.5994 | 0.14985  |
| 50 |           |         |         |                                                                         | 0.5994 | 0.14985  |
| 51 | Ksat      | texture | $m/s$   | Saturated hydraulic conductivity                                        | 1      | 0.25     |
| 52 |           |         |         |                                                                         | 1      | 0.25     |

|    |        |         |           |                                                                                                                      |         |        |      |
|----|--------|---------|-----------|----------------------------------------------------------------------------------------------------------------------|---------|--------|------|
| 53 |        |         |           |                                                                                                                      |         | 1      | 0.25 |
| 54 |        |         |           |                                                                                                                      |         | 1      | 0.25 |
| 55 |        |         |           |                                                                                                                      |         | 1      | 0.25 |
| 56 |        |         |           |                                                                                                                      |         | 1      | 0.25 |
| 57 |        |         |           |                                                                                                                      |         | 1      | 0.25 |
| 58 |        |         |           |                                                                                                                      |         | 1      | 0.25 |
| 59 |        |         |           |                                                                                                                      |         | 1      | 0.25 |
| 60 |        |         |           |                                                                                                                      |         | 1      | 0.25 |
| 61 |        |         |           |                                                                                                                      |         | 1      | 0.25 |
| 62 |        |         |           |                                                                                                                      |         | 1      | 0.25 |
| 63 |        |         |           |                                                                                                                      |         | 1      | 0.25 |
| 64 |        |         |           |                                                                                                                      |         | 1      | 0.25 |
| 65 |        |         |           |                                                                                                                      |         | 1      | 0.25 |
| 66 |        |         |           |                                                                                                                      |         | 1      | 0.25 |
| 67 | b      | texture | -         | Campbell parameter (the exponential parameter of Campbell's soil moisture retention model)                           |         | 1      | 0.25 |
| 68 |        |         |           |                                                                                                                      |         | 1      | 0.25 |
| 69 |        |         |           |                                                                                                                      |         | 1      | 0.25 |
| 70 |        |         |           |                                                                                                                      |         | 1      | 0.25 |
| 71 |        |         |           |                                                                                                                      |         | 1      | 0.25 |
| 72 |        |         |           |                                                                                                                      |         | 1      | 0.25 |
| 73 | f_leaf | global  | -         | The ratio of photosynthetically active radiation to shortwave radiation                                              | 0.5     | 0.125  |      |
| 74 | kc25   | global  | $\mu bar$ | Michaelis–Menten constants for CO <sub>2</sub> in 25°C                                                               | 274.6   | 68.65  |      |
| 75 | ko25   | global  | $m bar$   | Michaelis–Menten constants for O <sub>2</sub> in 25°C                                                                | 419.8   | 104.95 |      |
| 76 | tau25  | global  | -         | the CO <sub>2</sub> /O <sub>2</sub> specificity factor, which reflects the carbon assimilation efficiency of Rubisco | 2904.12 | 726.03 |      |

45 **Table S3. Summary of configurations of twin experiments, the variation of  $D_x$  during assimilation ( $D_{initial}$ ,  $D_{max}$ ,  $D_{final}$ ), and the relative changes of the parameters. The suffix “\*” indicates the multi-site experiment.**

| Site name | Data duration | $D_{itital}$ | $D_{max}$ | $D_{final}$ | Relative changes of parameters (%) |           |           |           |           |
|-----------|---------------|--------------|-----------|-------------|------------------------------------|-----------|-----------|-----------|-----------|
|           |               |              |           |             | $V_{cmax25}$                       | VJ_slope  | Ksat      | b         | f_leaf    |
| AT-Neu    | June 2015     | 1.39E+01     | 7.60E+03  | 1.48E-07    | -1.70E-07                          | 3.15E-07  | 4.62E-07  | 5.38E-07  | 1.19E-07  |
| DK-Sor    | June 2016     | 1.39E+01     | 7.60E+03  | 1.70E-08    | -5.95E-10                          | 6.23E-09  | 5.39E-08  | 4.83E-08  | 1.03E-08  |
| ES-Lma    | May 2016      | 1.39E+01     | 3.93E+03  | 8.80E-10    | 2.18E-09                           | -1.64E-09 | -1.53E-08 | -1.12E-08 | -1.09E-08 |
| FI-Hyy    | July 2013     | 6.97E+00     | 7.60E+03  | 2.57E-08    | 2.92E-09                           | 1.71E-08  | -1.24E-07 | 6.56E-08  | -1.36E-08 |
|           | July 2014     | 6.97E+00     | 7.60E+03  | 4.74E-09    | 1.11E-08                           | -3.58E-08 | 6.80E-08  | 4.69E-08  | -2.17E-09 |
|           | August 2014   | 6.97E+00     | 7.60E+03  | 1.02E-09    | 1.61E-09                           | -4.43E-09 | 6.25E-09  | -5.00E-09 | -1.17E-09 |
|           | July 2015     | 6.97E+00     | 7.60E+03  | 7.58E-10    | 1.34E-10                           | -2.84E-10 | -8.87E-09 | 1.58E-08  | -4.31E-10 |
|           | July 2016     | 6.97E+00     | 7.60E+03  | 4.53E-08    | -9.19E-08                          | 7.42E-08  | 7.07E-07  | -7.50E-07 | 1.74E-07  |
| July 2017 | 6.97E+00      | 7.60E+03     | 2.45E-08  | -4.00E-09   | 6.98E-08                           | -3.71E-07 | 4.80E-07  | -3.68E-08 |           |
| IT-Soy    | July 2017     | 1.39E+01     | 7.60E+03  | 6.98E-08    | 8.20E-08                           | 1.52E-06  | 8.19E-08  | 4.43E-08  | -8.42E-07 |

|         |             |          |          |          |           |           |           |           |           |
|---------|-------------|----------|----------|----------|-----------|-----------|-----------|-----------|-----------|
| US-Hal  | July 2012   | 1.39E+01 | 7.60E+03 | 1.63E-07 | 2.89E-08  | 3.37E-08  | -4.38E-07 | -1.83E-07 | -1.13E-07 |
|         | July 2013   | 1.39E+01 | 7.60E+03 | 2.36E-08 | 5.28E-09  | -1.19E-08 | 9.98E-09  | 1.43E-07  | -1.95E-08 |
| US-Wrc  | August 2014 | 6.97E+00 | 7.60E+03 | 2.84E-08 | -6.84E-08 | 7.98E-09  | 1.49E-07  | 2.86E-08  | 2.03E-07  |
| FI-Hyy* | August 2014 | 6.97E+00 | 7.60E+03 | 2.01E-08 | -6.62E-08 | 3.60E-07  | 1.24E-07  | -1.82E-07 | -1.60E-07 |
| US-Wrc* |             |          |          |          |           |           | -1.02E-07 | 1.67E-07  |           |
